# Supplementary material for: Human Mesenchymal Stromal Cell-Derived Extracellular Vesicles Modify Microglial Response and Improve Clinical Outcomes in Experimental Spinal Cord Injury
Source: PubMed Central journal article supplement (PMC5764957; doi:10.1038/s41598-017-18867-w), 2018-01-11

**Supplementary Information**

***Human Mesenchymal Stromal Cell-Derived Extracellular Vesicles Modify Microglial Response and Improve Clinical Outcomes in Experimental Spinal Cord Injury.***

Katherine A. Ruppert, PhD\*, Tin T. Nguyen, MD\*, Karthik S. Prabhakara, MS, Naama E. Toledano Furman, PhD, Amit K. Srivastava, PhD, Matthew T. Harting, MD, Charles S. Cox, Jr, MD, and Scott D. Olson, PhD

\*Both authors contributed equally to this manuscript

Department of Pediatric Surgery, McGovern Medical School at The University of Texas Health Science Center at Houston, Houston, TX, USA

## **Supplemental Figure and Table Legends**

### Supplemental Table S1      Locomotor Recovery Score Data

Animals treated with MSCEVs displayed significantly higher locomotor recovery scores when compared to sham and untreated SCI animals. At 5, 7 and 14 days post-injury, SCI + MSCEVs animals had significant improvement compared to untreated SCI (\*\*\*, $p<0.001$ , \*\*,  $p<0.01$ , \*\*,  $p<0.01$ , respectively). Treatment with MSCEVs results in significant functional improvement as early as 5 days following SCI. Values represent means +/- SEM. Sham laminectomy,  $n=6$ ; SCI + Vehicle,  $n=6$ ; SCI + MSCEV,  $n=16$ .

Supplemental Figure S1      MSCEv and MSCEV+ treatment reduces the expression of RT1B in the monocytes/macrophages (cd11b/c+, cd45+, p2y12-) populations in the spinal cord. Samples of epicenter and adjacent lumbar spinal cord tissue were processed for monocyte/macrophage population (cd11b/c<sup>+</sup>, cd45<sup>+</sup>, p2y12<sup>-</sup>) and analyzed for statistical significance using a One-Way ANOVA with Tukey's correction for multiple comparisons. There is a significant decrease in this cell population from animals treated with MSCEV<sup>wt</sup> (\*,  $p<0.05$ ) and MSCEV<sup>+</sup> (\*\*,  $p<0.01$ ) in the injury epicenter, as well as in the lumbar section, with MSCEV<sup>wt</sup> (\*\*,  $p<0.01$ ) and MSCEV<sup>+</sup> (\*,  $p<0.01$ ) when compared to injured animal values. Values represent means +/- SD. SCI + Vehicle,  $n=3$ ; SCI + MSCEV<sup>wt</sup>,  $n=4$ ; SCI + MSCEV<sup>+</sup>,  $n=4$ .

Supplemental Figure S2      MSCEv Effects on Immune Response in Blood and Spleen. Blood and spleen tissues were analyzed using flow cytometry to observe the immunomodulatory effects of MSCEV<sup>wt</sup> and MSCEV<sup>+</sup> treatment. There is a significant increase (\*\*\*,  $p$  value $<0.001$ ) in blood dendritic cells in MSCEV<sup>wt</sup> treated animals compared to injured controls. T cell DC conjugates, which are the marker for immune reaction, are increased with either MSCEV<sup>wt</sup> or MSCEV<sup>+</sup> (a). T reg and Treg/T cell ratio increased both in the spleen and blood for groups treated with MSCEV<sup>wt</sup> or MSCEV<sup>+</sup> (b). There is significant recovery of T cytotoxic cells in the blood of MSCEV<sup>wt</sup> (\*,  $p$  value $<0.05$ ) and MSCEV<sup>+</sup> (\*\*,  $p$  value $<0.01$ ) compared to injured controls (c). All data represented are means +/- SD. Statistical significance was analyzed using unpaired t-tests. Sham laminectomy + Vehicle,  $n=3$ ; SCI + Vehicle,  $n=3$ ; SCI + MSCEV<sup>wt</sup>,  $n=4$ ; SCI + MSCEV<sup>+</sup>,  $n=4$ .

**Table S1. Locomotor Recovery Scores**

| Sham Laminectomy + Vehicle |    |   | SCI + Vehicle |           |   | SCI + MSCEVs |           |    |
|----------------------------|----|---|---------------|-----------|---|--------------|-----------|----|
| Mean                       | SD | N | Mean          | SD        | N | Mean         | SD        | N  |
| 16                         | 0  | 6 | 0             | 0         | 6 | 0.15625      | 0.5072393 | 16 |
| 16                         | 0  | 6 | 0.3333333     | 0.8164966 | 6 | 0.375        | 0.8850612 | 16 |
| 16                         | 0  | 6 | 0.3333333     | 0.8164966 | 6 | 0.90625      | 1.157854  | 16 |
| 16                         | 0  | 6 | 2.166667      | 2.804758  | 6 | 5.21875      | 3.33151   | 16 |
| 16                         | 0  | 6 | 7.583333      | 1.562583  | 6 | 9.875        | 1.658312  | 16 |
| 16                         | 0  | 6 | 10.83333      | 1.505545  | 6 | 11.6875      | 1.973787  | 16 |
| 16                         | 0  | 6 | 11.33333      | 1.21106   | 6 | 13.625       | 1.607275  | 16 |

**Figure S1.** MSCEv and MSCEV+ treatment reduces the expression of RT1B in the monocytes/macrophages populations in the spinal cord

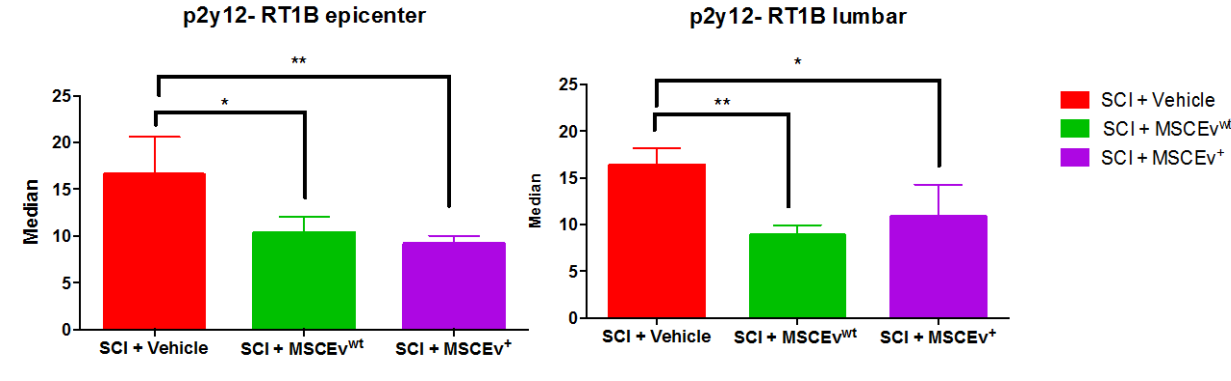

**Figure S2. MSCEv Effects on Immune Response in Blood and Spleen**

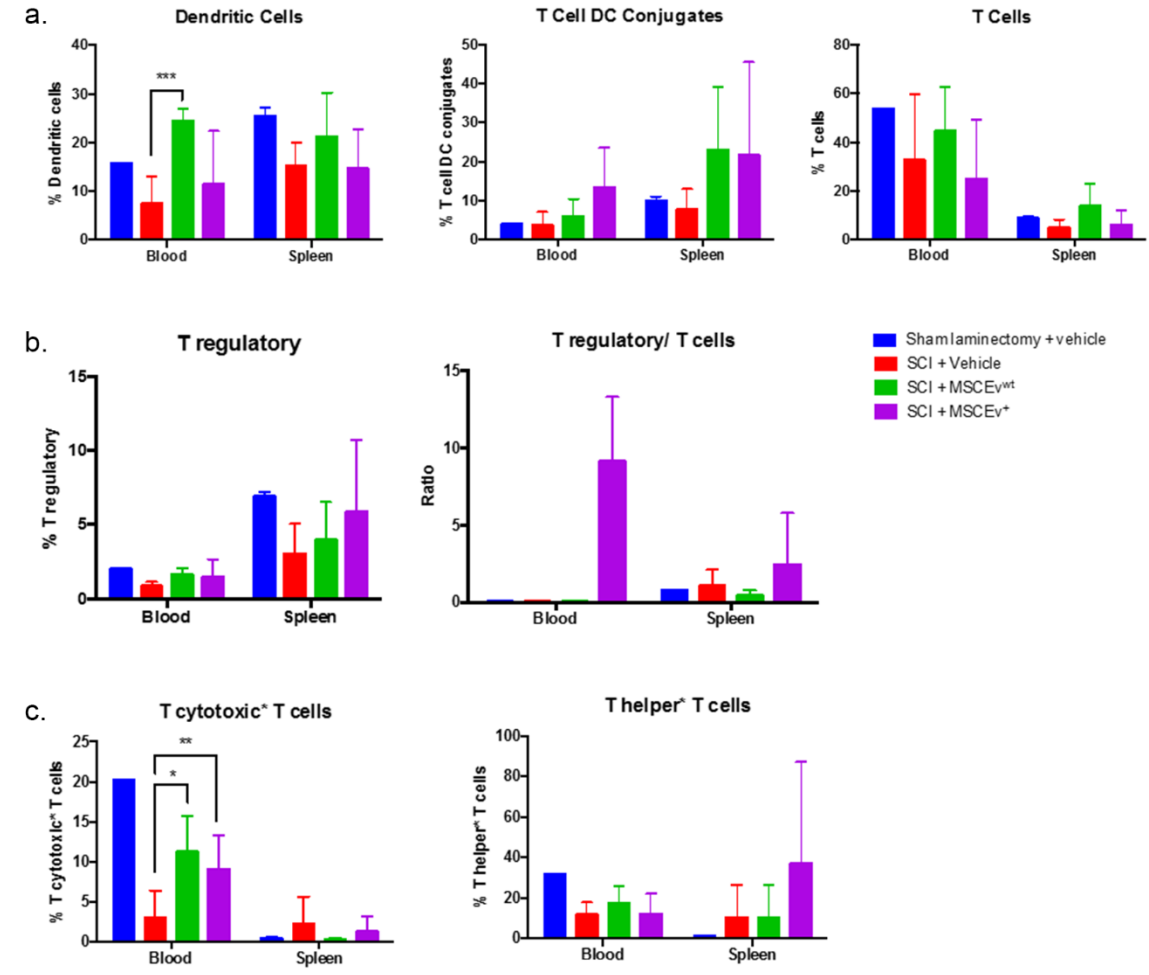

Supplement: 41598_2017_18867_MOESM1_ESM.pdf [file 41598_2017_18867_MOESM1_ESM.pdf]
